# Supplementary material
Source: HighWire-hosted journal article supplement (https://mentalhealth.bmj.com/content/23/4/155)
Supplement: inline-supplementary-material-1 [file inline-supplementary-material-1.pdf]

**Supplementary material: Studies included in review**

- Akizuki, N., H. Okamura, T. Akechi, T. Nakano, E. Yoshikawa, T. Nakanishi and Y. Uchitomi (2002). "Clinical experience of the pharmacological treatment algorithm for major depression in advanced cancer patients: Preliminary study." *Int J Psychiatr Clin Prac* 6(2): 83-90.
- Alamdarsaravi, M., A. Ghajar, A. A. Noorbala, M. Arbabi, A. Emami, F. Shahei, M. Mirzania, M. Jafarinaia, M. Afarideh and S. Akhondzadeh (2017). "Efficacy and safety of celecoxib monotherapy for mild to moderate depression in patients with colorectal cancer: A randomized double-blind, placebo controlled trial." *Psychiatr Res* 255: 59-65.
- Anton, S., D. Gugic, K. Katinic and J. Topic (2015). "Efficacy of Different Psychiatric Treatment Methods of Liaison Psychiatrist in Treatment of Women with Breast Cancer." *Coll Antropol* 39(2): 377-383.
- Armento, M. E. and D. R. Hopko (2009). "Behavioral activation of a breast cancer patient with coexistent major depression and generalized anxiety disorder." *Clin Case Stu* 8(1): 25-37.
- Ashing, K. and M. Rosales (2014). "A telephonic-based trial to reduce depressive symptoms among Latina breast cancer survivors." *Psychooncology* 23(5): 507-515.
- Beutel, M. E., G. Weissflog, K. Leuteritz, J. Wiltink, A. Haselbacher, C. Ruckes, S. Kuhnt, Y. Barthel, B. H. Imruck, R. Zwerenz and E. Brahler (2014). "Efficacy of short-term psychodynamic psychotherapy (STPP) with depressed breast cancer patients: results of a randomized controlled multicenter trial." *Ann Oncol* 25(2): 378-384.
- Blanco C., J. C. Markowitz, D. J. Hellerstein, et al. (2019). "A randomized trial of interpersonal psychotherapy, problem solving therapy, and supportive therapy for major depressive disorder in women with breast cancer." *Breast Cancer Res Treat* 173(2): 353-364.
- Blanco, C., J. C. Markowitz, D. L. Hershman, J. A. Levenson, S. Wang and V. R. Grann (2014). "A pilot study of interpersonal psychotherapy for depressed women with breast cancer." *Amer J Psychotherapy* 68(4): 489-495.
- Bourke, J. D., C. Plant and S. Wooldridge (2018) "Interpersonal psychotherapy with expressive art for depression in a psycho-oncology context." *Clin Case Stud* 17(6): 453-468.
- Brothers, B. M., H.-C. Yang, D. R. Strunk and B. L. Andersen (2011). "Cancer patients with major depressive disorder: Testing a biobehavioral/cognitive behavior intervention." *J Consult Clin Psych* 79(2): 253-260.
- Capozzo, M. A., G. Schillani, E. Aguglia, M. De Vanna, L. Grassi, M. A. Conte and T. Giraldi (2009). "Serotonin transporter 5-HTTLPR polymorphism and response to citalopram in terminally ill cancer patients: report of twenty-one cases." *Tumori* 95(4): 479-483.
- Carvalho, J. P. and D. R. Hopko (2009). "Treatment of a depressed breast cancer patient with problem-solving therapy." *Clin Case Stud* 8(4): 263-276.

- Centeno, C., A. Sanz, M. A. Cuervo, D. Ramos, S. Hernansanz, J. Gonzalez, M. J. Almaraz, M. Lama, F. Vara, M. Nabal and A. Pascual (2012). "Multicentre, double-blind, randomised placebo-controlled clinical trial on the efficacy of methylphenidate on depressive symptoms in advanced cancer patients." *BMJ Support Palliat Care* 2(4): 328-333.
- Chen, J., C. Chen and S. Zhi (2014). "Retrospective comparison of cognitive behavioral therapy and symptom-specific medication to treat anxiety and depression in throat cancer patients after laryngectomy." *Shanghai Arch Psychiatr* 26(2): 95-100.
- De Berardis, D., M. Brucchi, N. Serroni, A. Valchera, M. Fornaro, M. Mazza, G. Martinotti and M. Di Giannantonio (2014). "Successful use of agomelatine in the treatment of major depression in a woman taking tamoxifen: a case report." *Clin Neuropharmacol* 37(1): 31-33.
- Desautels, C., J. Savard, H. Ivers, M.-H. Savard and A. Caplette-Gingras (2018). "Treatment of depressive symptoms in patients with breast cancer: A randomized controlled trial comparing cognitive therapy and bright light therapy." *Health Psychology* 37(1): 1-13.
- Ersoy, M. A., A. M. Noyan and H. Elbi (2008). "An open-label long-term naturalistic study of mirtazapine treatment for depression in cancer patients." *Clin Drug Investig* 28(2): 113-120.
- Fan, W., H. Yang, Y. Sun, J. Zhang, G. Li, Y. Zheng and Y. Liu (2017). "Ketamine rapidly relieves acute suicidal ideation in cancer patients: a randomized controlled clinical trial." *Oncotarget* 8(2): 2356-2360.
- Fisch, M. J., P. J. Loehrer, J. Kristeller, S. Passik, S. H. Jung, J. Shen, M. A. Arquette, M. J. Brames and L. H. Einhorn (2003). "Fluoxetine versus placebo in advanced cancer outpatients: a double-blinded trial of the Hoosier Oncology Group." *J Clin Oncol* 21(10): 1937-1943.
- Gawrysiak, M. J., S. A. Swan, C. R. Nicholas, B. P. Rogers, J. H. Dougherty and D. R. Hopko (2013). "Pragmatic psychodynamic psychotherapy for a patient with depression and breast cancer: Functional MRI evaluation of treatment effects." *Amer J Psychotherapy* 67(3): 237-256.
- Goerling, U., A. Foerg, S. Sander, N. Schramm and P. M. Schlag (2011). "The impact of short-term psycho-oncological interventions on the psychological outcome of cancer patients of a surgical-oncology department - a randomised controlled study." *Eur J Cancer* 47(13): 2009-2014.
- Goerling, U., C. Jaeger, A. Walz, A. Stickel, M. Mangler and E. van der Meer (2014). "The efficacy of short-term psycho-oncological interventions for women with gynaecological cancer: a randomized study." *Oncology* 87(2): 114-124.
- Gonzalez-Fernandez, S., C. Fernandez-Rodriguez, M. D. Paz-Caballero and M. Perez-Alvarez. "Treating anxiety and depression of cancer survivors: Behavioral activation versus acceptance and commitment therapy." *Psicothema* 30(1): 14-20.

- Grassi, L., B. Biancosino, L. Marmai and R. Righi (2004). "Effect of reboxetine on major depressive disorder in breast cancer patients: An open-label study." *Journal Clin Psychiatry* 65(4): 515-520.
- Greer, S., S. Moorey, J. D. Baruch, M. Watson, B. M. Robertson, A. Mason, L. Rowden, M. G. Law and J. M. Bliss (1992). "Adjuvant psychological therapy for patients with cancer: a prospective randomised trial." *BMJ* 304(6828): 675-680.
- Griffiths, R. R., M. W. Johnson, M. A. Carducci, A. Umbricht, W. A. Richards, B. D. Richards, M. P. Cosimano and M. A. Klinedinst (2016). "Psilocybin produces substantial and sustained decreases in depression and anxiety in patients with life-threatening cancer: A randomized double-blind trial." *J Psychopharmacology* 30(12): 1181-1197.
- Hannon, B., P. Fitzgerald and M. Murphy (2008). "Treatment of depression as part of end-of-life care." *BMJ Case Rep* 2008: bcr0820080841.
- Hirayama, T., Y. Ogawa, Y. Yanai, et al. (2019). "Behavioral activation therapy for depression and anxiety in cancer patients: A case series study." *BioPsychoSoc Med* 13: 9.
- Holland, J. C., S. J. Romano, J. H. Heiligenstein, R. G. Tepner and M. G. Wilson (1998). "A controlled trial of fluoxetine and desipramine in depressed women with advanced cancer." *Psychooncology* 7(4): 291-300.
- Hopko, D. R. and L. K. Colman (2010). "The impact of cognitive interventions in treating depressed breast cancer patients." *J Co Psychotherapy* 24(4): 314-328.
- Hopko, D. R., M. E. Armento, S. M. Robertson, M. M. Ryba, J. P. Carvalho, L. K. Colman, C. Mullane, M. Gawrysiak, J. L. Bell, J. K. McNulty and C. W. Lejuez (2011). "Brief behavioral activation and problem-solving therapy for depressed breast cancer patients: Randomized trial." *J Consulting Clin Psych* 79(6): 834-849.
- Hopko, D., J. Bell, M. Armento, M. Hunt and C. Lejuez (2005). "Behavior Therapy for Depressed Cancer Patients in Primary Care." *Psychotherapy: Theory, Research, Practice, Training* 42(2): 236-243.
- Hopko, D., J. Funderburk, R. Shorey, C. McIndoo, M. Ryba, A. File, K. Benson and M. Vitulano (2013). "Behavioral activation and problem-solving therapy for depressed breast cancer patients: Preliminary support for decreased suicidal ideation." *Behavior Modification* 37(6): 747-767.
- Irwin, S. A. and A. Iglewicz (2010). "Oral ketamine for the rapid treatment of depression and anxiety in patients receiving hospice care." *J Palliat Med* 13(7): 903-908.
- Jansen, F, B. I. Lissenberg-Witte, A. M. H. Krebber, et al. (2019). "Stepped care targeting psychological distress in head and neck cancer and lung cancer patients: which groups specifically benefit? Secondary analyses of a randomized controlled trial." *Supp Care Cancer* (12): 4543-4553.

- Jewett, B. E., M. N. Miller, L. A. Ligon, et al. (2020). "Rapid and temporary improvement of depression and anxiety observed following niraparib administration: A case report." *BMC Psychiatr* 20: 171.
- Kangas, M., C. Milross and R. A. Bryant (2014). "A brief, early cognitive-behavioral program for cancer-related PTSD, anxiety, and comorbid depression." *Cognitive and Behavioral Practice* 21(4): 416-431.
- Kangas, M., C. Milross, A. Taylor and R. A. Bryant (2013). "A pilot randomized controlled trial of a brief early intervention for reducing posttraumatic stress disorder, anxiety and depressive symptoms in newly diagnosed head and neck cancer patients." *Psychooncology* 22(7): 1665-1673.
- Kroenke, K., D. Theobald, J. Wu, K. Norton, G. Morrison, J. Carpenter and W. Tu (2010). "Effect of telecare management on pain and depression in patients with cancer: A randomized trial." *J Am Med Assoc* 304(2): 163-171.
- Kugaya, A., T. Akechi, T. Nakano, H. Okamura, Y. Shima and Y. Uchitomi (1999). "Successful antidepressant treatment for five terminally ill cancer patients with major depression, suicidal ideation and a desire for death." *Support Care Cancer* 7(6): 432-436.
- Lee, J. Y., H. Y. Park, D. Jung, M. Moon, B. Keam and B. J. Hahm (2014). "Effect of brief psychoeducation using a tablet PC on distress and quality of life in cancer patients undergoing chemotherapy: a pilot study." *Psychooncology* 23(8): 928-935.
- Levesque, M., J. Savard, S. Simard, J. G. Gauthier and H. Ivers (2004). "Efficacy of cognitive therapy for depression among women with metastatic cancer: A single-case experimental study." *J Behav Therapy and Exp Psychiatry* 5(4): 287-305.
- Li, X. J., Z. Y. Dai, B. Y. Zhu, J. P. Zhen, W. F. Yang and D. Q. Li (2014). "Effects of sertraline on executive function and quality of life in patients with advanced cancer." *Med Sci Monit* 20: 1267-1273.
- Macleod, A. D. (1998). "Methylphenidate in terminal depression." *J Pain Symptom Manage* 16(3): 193-198.
- McCusker, J., M. Yaffe, R. Faria, S. Lambert, M. Li, J. Poirier-Bisson, M. Magalhaes and M. de Raad (2018). "Phase II trial of a depression self-care intervention for adult cancer survivors." *Eur J Cancer Care* 27(1): 1-16.
- Mejia-Castrejon, J. and E. Landa-Ramirez (2014). "Cognitive behavioural therapy for depression in multiple endocrine neoplasia type IIB: a 1-year follow-up." *BMJ Case Rep* 2014.
- Mohammadinejad, P., P. Arya, M. Esfandbod, A. Kaviani, M. Najafi, L. Kashani, A. Zeinoddini, S. A. Emami and S. Akhondzadeh (2015). "Celecoxib Versus Diclofenac in Mild to Moderate Depression Management Among Breast Cancer Patients: A Double-Blind, Placebo-Controlled, Randomized Trial." *Ann Pharmacother* 49(9): 953-961.

- Moorey, S., E. Cort, M. Kapari, B. Monroe, P. Hansford, K. Mannix, M. Henderson, L. Fisher and M. Hotopf (2009). "A cluster randomized controlled trial of cognitive behaviour therapy for common mental disorders in patients with advanced cancer." *Psychological Med* 39(5): 713-723.
- Murphy, M. J., J. M. Newby, P. Butow, et al. (2020). "Randomised controlled trial of internet-delivered cognitive behaviour therapy for clinical depression and/or anxiety in cancer survivors (iCanADAPT Early)." *Psychooncology* 29(1): 76-85.
- Musselman, D. L., W. I. Somerset, Y. Guo, A. K. Manatunga, M. Porter, S. Penna, B. Lewison, R. Goodkin, K. Lawson, D. Lawson, D. L. Evans and C. B. Nemeroff (2006). "Double-Blind, Multicenter, Parallel-Group Study of Paroxetine, Desipramine, or Placebo in Breast Cancer Patients (stages I, II, III, and IV) With Major Depression." *J Clin Psychiatry* 67(2): 288-296.
- Ng, C. G., M. P. Boks, K. C. Roes, N. Z. Zainal, A. H. Sulaiman, S. B. Tan and N. J. de Wit (2014). "Rapid response to methylphenidate as an add-on therapy to mirtazapine in the treatment of major depressive disorder in terminally ill cancer patients: A four-week, randomized, double-blinded, placebo-controlled study." *Eur Neuropsychopharmacology* 24(4): 491-498.
- Nobels, A., K. Geboes and G. M. Lemmens (2016). "May depressed and anxious patients with carcinoid syndrome benefit from treatment with selective serotonin reuptake inhibitors (SSRIs)? findings from a case report." *Acta Oncol* 55(11): 1370-1372.
- Olin, J. and P. Masand (1996). "Psychostimulants for depression in hospitalized cancer patients." *Psychosomatics* 37(1): 57-62.
- Pae, C.-U., Y.-J. Kim, W.-Y. Won, H.-J. Kim, S. Lee, C.-U. Lee, S.-J. Lee, D.-W. Kim, C. Lee, W.-S. Min, C.-C. Kim, I.-H. Paik and A. Serretti (2004). "Paroxetine in the treatment of depressed patients with haematological malignancy: An open-label study." *Human Psychopharmacology: Clinical and Experimental* 19(1): 25-29.
- Park, H. Y., B.-J. Lee, J.-H. Kim, J.-N. Bae and B.-J. Hahm (2012). "Rapid improvement of depression and quality of life with escitalopram treatment in outpatients with breast cancer: A 12-week, open-label prospective trial." *Progress in Neuro-Psychopharmacology & Biological Psychiatry* 36(2): 318-323.
- Pezzella, G., R. Moslinger-Gehmayr and A. Contu (2001). "Treatment of depression in patients with breast cancer: a comparison between paroxetine and amitriptyline." *Breast Cancer Res Treat* 70(1): 1-10.
- Qiu, J., W. Chen, X. Gao, Y. Xu, H. Tong, M. Yang, Z. Xiao and M. Yang (2013). "A randomized controlled trial of group cognitive behavioral therapy for Chinese breast cancer patients with major depression." *J Psychosom Obstet Gynecol* 34(2): 60-67.
- Razavi, D., J. F. Allilaire, M. Smith, A. Salimpour, M. Verra, B. Desclaux, P. Saltel, I. Piollet, A. Gauvain-Piquard, C. Trichard, B. Cordier, R. Fresco, E. Guillibert, D. Sechter, J. P. Orth,

- M. Bouhassira, P. Mesters and P. Blin (1996). "The effect of fluoxetine on anxiety and depression symptoms in cancer patients." *Acta Psychiatr Scand* 94(3): 205-210.
- Ren, W., H. Qiu, Y. Yang, et al. (2019). "Randomized controlled trial of cognitive behavioural therapy for depressive and anxiety symptoms in Chinese women with breast cancer." *J Psychiatr Res* 271: 52-59.
- Rodin, G., C. Lo, A. Rydall, et al. (2018). "Managing Cancer and Living Meaningfully (CALM): A Randomized Controlled Trial of a Psychological Intervention for Patients With Advanced Cancer." *J Clin Oncol* 36(23): 2422-2432.
- Rodriguez Vega, B., A. Palao, G. Torres, A. Hospital, G. Benito, E. Perez, M. Dieguez, B. Castelo and C. Bayon (2011). "Combined therapy versus usual care for the treatment of depression in oncologic patients: A randomized controlled trial." *Psychooncology* 20(9): 943-952.
- Ross, S., A. Bossis, J. Guss, G. Agin-Liebes, T. Malone, B. Cohen, S. E. Mennenga, A. Belser, K. Kalliontzi, J. Babb, Z. Su, P. Corby and B. L. Schmidt (2016). "Rapid and sustained symptom reduction following psilocybin treatment for anxiety and depression in patients with life-threatening cancer: A randomized controlled trial." *J Psychopharmacology* 30(12): 1165-1180.
- Ryba, M. M., C. Lejuez and D. R. Hopko (2014). "Behavioral activation for depressed breast cancer patients: The impact of therapeutic compliance and quantity of activities completed on symptom reduction." *J Consult Clin Psych* 82(2): 325-335.
- Ryu, J. S., S. W. Choi, S. S. Yun, et al. (2018). "Preliminary Findings on the Effectiveness of Meaning-Centered Psychotherapy in Patients with Pancreatobiliary Cancer." *Yonsei Med J* 59(9): 1107-1114.
- Savard, J., S. Simard, I. Giguere, H. Ivers, C. M. Morin, E. Maunsell, P. Gagnon, J. Robert and D. Marceau (2006). "Randomized clinical trial on cognitive therapy for depression in women with metastatic breast cancer: psychological and immunological effects." *Palliat Support Care* 4(3): 219-237.
- Serfaty, M., M. King, I. Nazareth, et al. (2020). "Effectiveness of cognitive-behavioural therapy for depression in advanced cancer: CanTalk randomised controlled trial." *Brit J Psychiatr* 216(4): 213-221.
- Serfaty, M., S. Wilkinson, C. Freeman, K. Mannix and M. King (2012). "The ToT study: helping with Touch or Talk (ToT): a pilot randomised controlled trial to examine the clinical effectiveness of aromatherapy massage versus cognitive behaviour therapy for emotional distress in patients in cancer/palliative care." *Psychooncology* 21(5): 563-569.
- Sexton, J., R. S. Atayee and H. C. Bruner (2018). "Case Report: Ketamine for Pain and Depression in Advanced Cancer." *J Palliat Med* 21(11): 1670-1673.

- Sharpe, M., J. Walker, C. H. Hansen, P. Martin, S. Symeonides, C. Gourley, L. Wall, D. Weller and G. Murray (2014). "Integrated collaborative care for comorbid major depression in patients with cancer (SMaRT Oncology-2): A multicentre randomised controlled effectiveness trial." *Lancet* 384(9948): 1099-1108.
- Sharpe, M., V. Strong, K. Allen, R. Rush, P. Maguire, A. House, A. Ramirez and A. Cull (2004). "Management of major depression in outpatients attending a cancer centre: a preliminary evaluation of a multicomponent cancer nurse-delivered intervention." *Br J Cancer* 90(2): 310-313.
- Stefanczyk-Sapieha, L., D. Oneschuk and M. Demas (2008). "Intravenous ketamine "burst" for refractory depression in a patient with advanced cancer." *J Palliat Med* 11(9): 1268-1271.
- Strong, V., R. Waters, C. Hibberd, G. Murray, L. Wall, J. Walker, G. McHugh, A. Walker and M. Sharpe (2008). "Management of depression for people with cancer (SMaRT oncology 1): A randomised trial." *Lancet* 372(9632): 40-48.
- Sullivan, D. R., S. Mongoue-Tchokote, M. Mori, E. Goy and L. Ganzini (2017). "Randomized, double-blind, placebo-controlled study of methylphenidate for the treatment of depression in SSRI-treated cancer patients receiving palliative care." *Psychooncology* 26(11): 1763-1769.
- Theobald, D. E., K. L. Kirsh, E. Holtsclaw, K. Donaghy and S. D. Passik (2003). "An open label pilot study of citalopram for depression and boredom in ambulatory cancer patients." *Palliat Support Care* 1(1): 71-77.
- Torta, R., C. Berra, L. Binaschi and R. Borio (2007). "Amisulpride in the short-term treatment of depressive and physical symptoms in cancer patients during chemotherapies." *Support Care Cancer* 15(5): 539-546.
- Torta, R., I. Siri and P. Caldera (2008). "Sertraline effectiveness and safety in depressed oncological patients." *Support Care Cancer* 16(1): 83-91.
- Torta, R., P. Leombruni, R. Borio and L. Castelli (2011). "Duloxetine for the treatment of mood disorder in cancer patients: a 12-week case-control clinical trial." *Hum Psychopharmacol* 26(4-5): 291-299.
- Trinidad, A. C., E. F. Simopoulos and D. L. Flosnik (2011). "The use of antidepressants in cancer treatment." *Psychiatric Ann* 41(9): 443-446.
- Van Fleet, S. (2007). "Psychiatry consultation in a patient with early breast cancer." *Oncology (Williston Park)* 21(11): 22-26.
- van Heeringen, K. and M. Zivkov (1996). "Pharmacological treatment of depression in cancer patients. A placebo-controlled study of mianserin." *Br J Psychiatr* 169(4): 440-443.
- Walker, J., C. H. Hansen, P. Martin, S. Symeonides, C. Gourley, L. Wall, D. Weller, G. Murray and M. Sharpe (2014). "Integrated collaborative care for major depression comorbid with

a poor prognosis cancer (SMaRT Oncology-3): a multicentre randomised controlled trial in patients with lung cancer." *Lancet Oncol* 15(10): 1168-1176.

Wells, C., S. Malins, S. Clarke, et al. (2020). "Using smart-messaging to enhance mindfulness-based cognitive therapy for cancer patients: A mixed methods proof of concept evaluation." *Psychooncology* 29(1): 212-219.

Wells-Di Gregorio, S. M., D. R. Marks, J. DeCola et al. (2019) "Pilot randomized controlled trial of a symptom cluster intervention in advanced cancer." *Psychooncology* 28(1): 76-84.

Zanicotti, C. G., D. Perez and P. Glue (2012). "Mood and pain responses to repeat dose intramuscular ketamine in a depressed patient with advanced cancer." *J Palliat Med* 15(4): 400-403.
